# Supplementary material for: Role for a bidentate ribonuclease in the initiation step of RNA interference
Source: Springer Nature journal article supplement (doi:10.1038/35053110), 2001-01-01

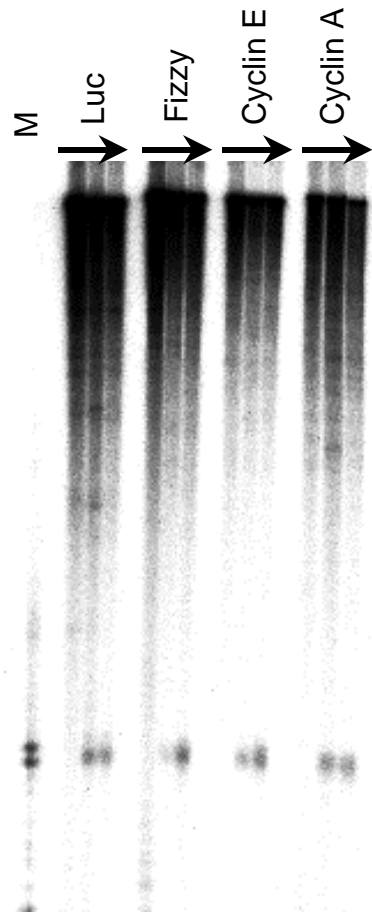

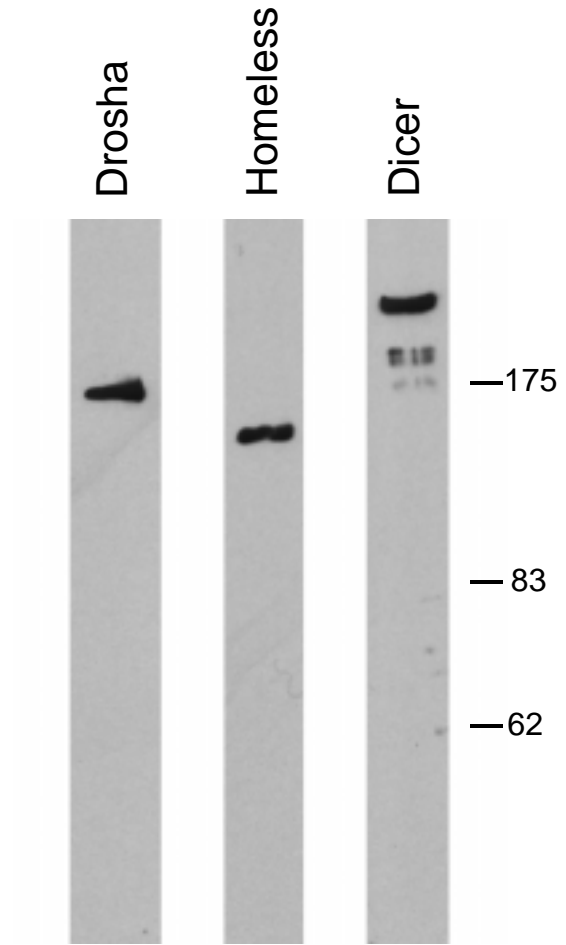

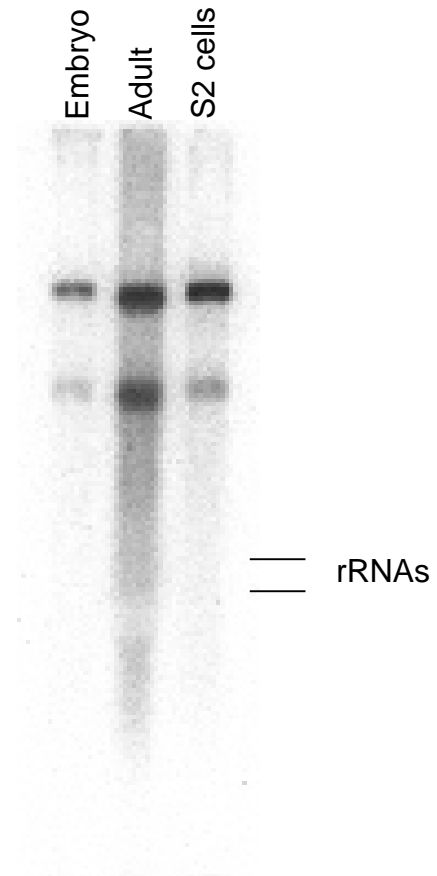

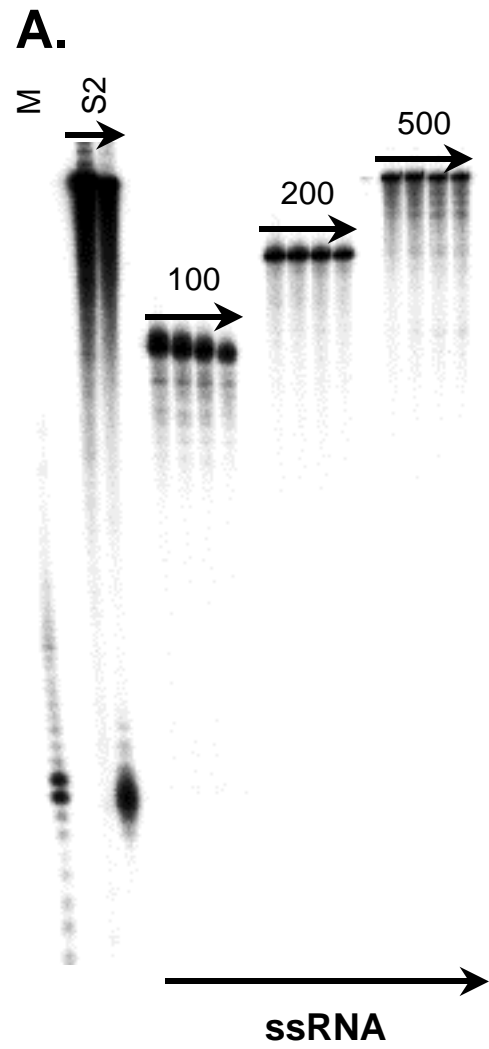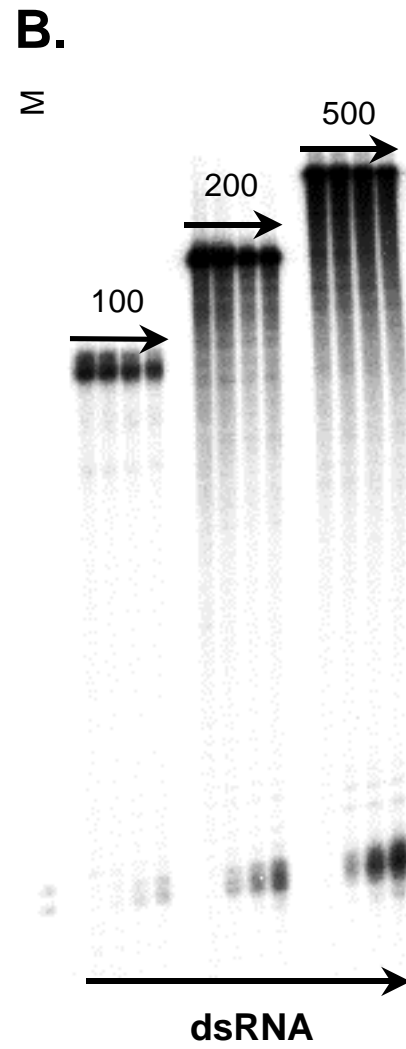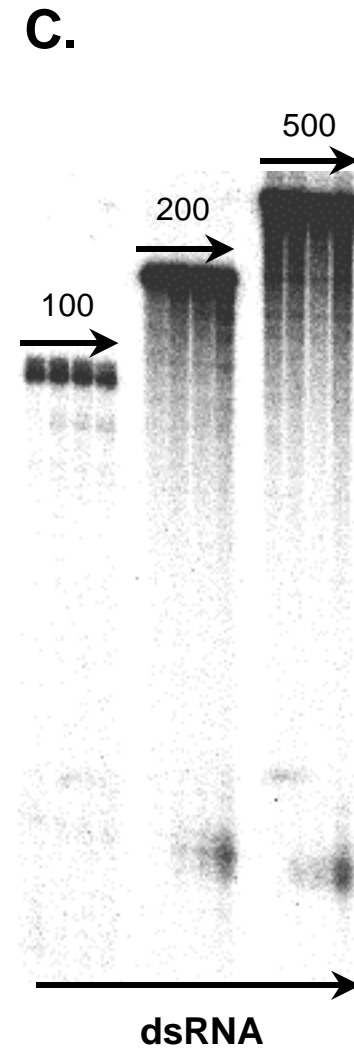

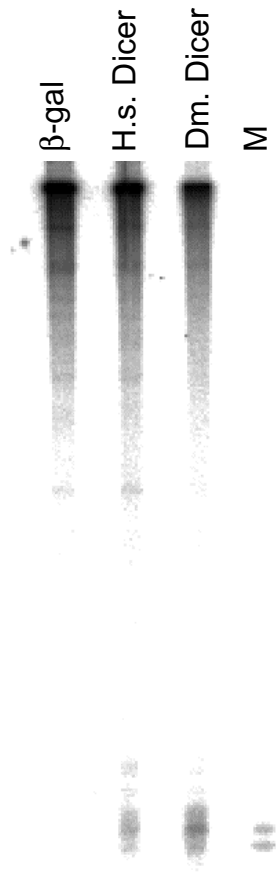

A.

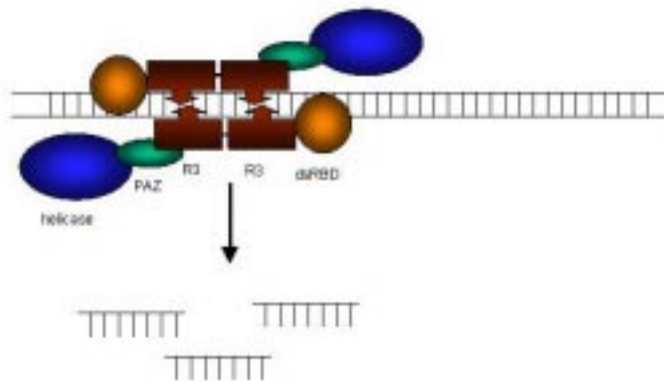

B.

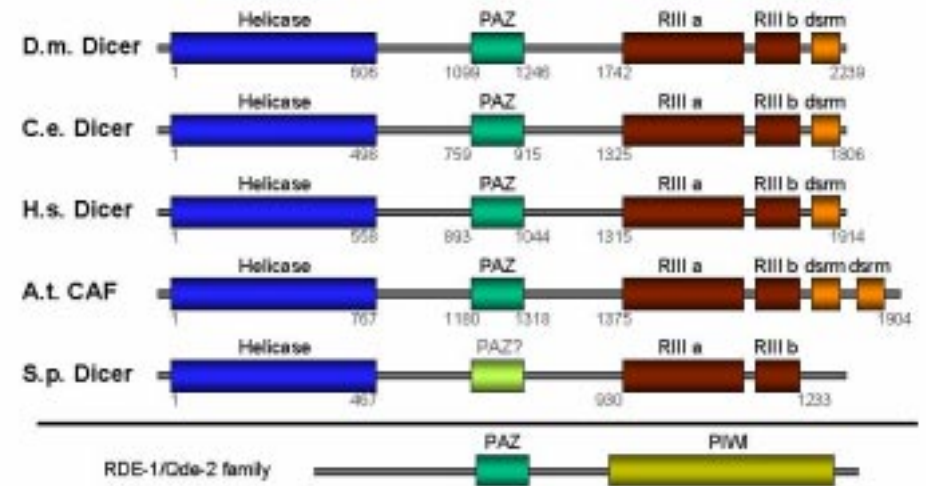

Supplement: 41586_2001_BF35053110_MOESM1_ESM.pdf [file 41586_2001_BF35053110_MOESM1_ESM.pdf]
